## ECCO Position Statement

# ECCO Position Statement on the Use of Biosimilars for Inflammatory Bowel Disease—An Update

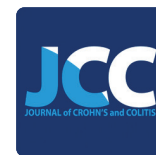

Silvio Danese,<sup>a,b</sup> Gionata Fiorino,<sup>c</sup> Tim Raine,<sup>d</sup> Marc Ferrante,<sup>e</sup>  
Karen Kemp,<sup>f</sup> Jaroslaw Kierkus,<sup>g</sup> Peter L. Lakatos,<sup>h</sup>  
Gerassimos Mantzaris,<sup>i</sup> Janneke van der Woude,<sup>j</sup> Julian Panes,<sup>k</sup>  
Laurent Peyrin-Biroulet<sup>l</sup>

<sup>a</sup>ECCO Governing Board; IBD Center, Humanitas Research Hospital, Rozzano, Milan, Italy <sup>b</sup>Department of Biomedical Sciences, Humanitas University, Rozzano, Milan, Italy <sup>c</sup>ECCO GuiCom; IBD Center, Humanitas Research Hospital, Rozzano, Milan, Italy <sup>d</sup>Y-ECCO; Department of Medicine, University of Cambridge, Cambridge, UK <sup>e</sup>ECCO ClinCom; Department of Gastroenterology and Hepatology, University Hospitals Leuven, Leuven, Belgium <sup>f</sup>N-ECCO; University of Manchester/Manchester Royal Infirmary, School for Nursing/Gastroenterology, Manchester, UK <sup>g</sup>P-ECCO; Department of Gastroenterology, Hepatology, Feeding Disorders and Paediatrics, Children's Memorial Health Institute, Warsaw, Poland <sup>h</sup>ECCO EduCom; 1st Department of Medicine, Semmelweis University, Budapest, Hungary <sup>i</sup>ECCO Governing Board; Department of Gastroenterology, Evangelismos Hospital, Athens, Greece <sup>j</sup>ECCO SciCom; Department of Gastroenterology & Hepatology, Erasmus Medical Center, Rotterdam, The Netherlands <sup>k</sup>ECCO Governing Board; University Hospital Clínic de Barcelona, Barcelona, Spain <sup>l</sup>ECCO Governing Board; Gastroenterology and Inserm U954, University Hospital of Nancy, Nancy, France

Corresponding author: Prof. Silvio Danese, MD, PhD, Department of Biomedical Sciences, Humanitas University, Via Manzoni 113, 20089 Rozzano, Milan, Italy. Tel.: +390282244771; fax: +390282242591; email: [sdanese@hotmail.com](mailto:sdanese@hotmail.com)

## 1. Introduction

Biosimilars of infliximab were first approved by the European Medicine Agency in 2013,<sup>1,2</sup> based on pre-clinical studies on biosimilarity and on clinical data coming from two randomised controlled trials conducted in rheumatoid arthritis [RA] and ankylosing spondylitis [AS].<sup>3,4</sup> Initially the European Crohn's Colitis Organisation [ECCO] raised some caution on the use of biosimilars.<sup>5</sup> This cautious approach was also supported by several national inflammatory bowel disease [IBD] societies<sup>5–12</sup> [Table 1]. An insufficient understanding of the characteristics and use of biosimilars became evident in a web survey among ECCO members in the same period.<sup>13</sup>

Since biosimilars were introduced in the EU market in early 2015, more data from IBD patients<sup>14–19</sup> have supported the biosimilarity of biosimilar infliximab CT-P13 and the reference product, with no significant differences in terms of efficacy or safety, in either naïve or switched patients in cohort studies. Importantly, a study showed clear cross-reactivity between the infliximab originator and CT-P13.<sup>20</sup> Recently, a large nationwide Norwegian randomised controlled trial [NOR-SWITCH] on patients with immune-mediated diseases [Crohn's disease; ulcerative colitis; psoriasis; psoriatic

arthritis; RA and AS] found no differences in terms of clinical response, maintenance of remission, or adverse events in patients receiving CT-P13 compared with those receiving originator infliximab.<sup>21</sup> Consideration of these findings<sup>22</sup> together with a better understanding of the process of biosimilar development and regulatory approval, have contributed to a change in the perception of IBD experts, who now prescribe biosimilars with significantly more confidence.<sup>23</sup>

A task-force including Governing Board representatives and one representative from pertinent ECCO Committees performed a literature search and made relevant statements to summarise their shared position. The proposed statements were then discussed, agreed and approved in a Consensus meeting.

## 2. Regulatory Process by EMA for Biosimilars

The licensing of any biosimilar medication by the European Medicines Agency [EMA] is subject to strict regulatory oversight. Many of the principles are shared with the regulatory processes governing the licensing of generic chemical compounds, but due to the greatly increased complexity and potential for variability,

**Table 1.** Available society guidelines.

| Author, date                                      | Society                                        | Biosimilarity | Interchangeability | Same INN? | Extrapolation | Automatic substitution | Use in naive patients | Switching        | Therapeutic freedom on prescription | Postmarketing surveillance/registries required |
|---------------------------------------------------|------------------------------------------------|---------------|--------------------|-----------|---------------|------------------------|-----------------------|------------------|-------------------------------------|------------------------------------------------|
| No authors listed <sup>8</sup> [2015]             | British Society of Gastroenterology            | Yes           | No                 | No        | NA            | No                     | Yes                   | Yes              | Yes, by brand name                  | Yes                                            |
| Vermeire <i>et al.</i> <sup>9</sup> [2015]        | Belgian IBD Research and Development           | Questionable  | No                 | NA        | No            | No                     | Yes                   | No               | Yes                                 | NA                                             |
| Mularczyk <i>et al.</i> <sup>10</sup> [2014]      | Polish National Consultant in Gastroenterology | Questionable  | No                 | NA        | No            | No                     | Yes                   | Awaiting studies | NA                                  | NA                                             |
| Argüelles-Arias <i>et al.</i> <sup>7</sup> [2013] | Spanish Society of Gastroenterology            | Questionable  | No                 | No        | No            | No                     | Yes                   | No               | NA                                  | Yes                                            |
| de Ridder <i>et al.</i> <sup>11</sup> [2015]      | ESPGHAN Paediatric IBD Porto Group             | Questionable  | No                 | No        | No            | No                     | Yes                   | No               | NA                                  | Yes                                            |
| Annese <i>et al.</i> <sup>6</sup> [2014]          | Italian Group for IBD                          | Questionable  | No                 | No        | No            | No                     | Yes                   | Awaiting studies | NA                                  | Yes                                            |
| Devlin <i>et al.</i> <sup>12</sup> [2013]         | Canadian Association of Gastroenterology       | Questionable  | No                 | NA        | No            | No                     | Awaiting studies      | No               | NA                                  | Yes                                            |
| Danese <i>et al.</i> <sup>5</sup> [2013]          | European Crohn's and Colitis Organisation      | Questionable  | No                 | No        | No            | No                     | Awaiting studies      | No               | NA                                  | Yes                                            |

NA, not available; INN, International Non-Proprietary Name.

a series of directives have been applied specifically to biosimilars. Taken together, these require a body of evidence of biochemical and clinical equivalence to the originator compound, as well as assurance of the quality and oversight of production.<sup>24</sup>

At the biochemical level, the compounds must first demonstrate equivalent composition. The primary structure is analysed [e.g. amino acid composition analysis, peptide mapping, C- and N- terminus sequencing] with particular attention to analysis of post-translational modifications, which are liable to variation due to differences in cell lines used for antibody expression. The higher order structure of the biosimilar is also determined [e.g. disulphide bond mapping], and impurity analysis performed. Next, the biosimilar must be characterised *in vitro* against the originator compound to demonstrate biological characteristics relevant to the mechanism of action of the drug. For anti-tumour necrosis factor [TNF- $\alpha$ ] biosimilars, this includes demonstration of neutralisation of TNF- $\alpha$ , as well as the induction of apoptosis, the ability to fix complement and drive antibody-dependent cell-mediated cytotoxicity in a range of cells, and tests of the binding affinities of the constant [Fc] region of the antibody to cellular receptors. Further physicochemical tests include measures of batch-to-batch consistency, as well as verification of stability data. Full oversight of the manufacturing process takes account of procedures for buffer manufacture and storage, filtration and lyophilisation procedures, and all aspects of packaging. Given the large number of biological materials used in manufacture, the EMA also scrutinise risk management for prevention of transmission of infectious agents, including prions, mycoplasma, and viral agents.<sup>25-27</sup>

Clinical data must then be presented to demonstrate: [i] pharmacokinetic and pharmacodynamic equivalence to the originator compound, including immunogenicity data; and [ii] clinical efficacy equivalence in one of the licensed indications. Multiple data analyses are scrutinised by the EMA, with pivotal examples set out in Table 2. Where the mechanism of action of the drug is well established and common between multiple indications, clinical data from equivalence studies in one reference disease indication form the basis for extrapolation of the efficacy and safety data to other licensed indications without the need for specific clinical trials in these other indications [see extrapolation below]. However, where the action is less well characterised, where patient populations may differ in risk, or where the mechanism of action may differ between indications, more extensive pre-clinical data will be required to support licensing.<sup>28</sup>

An important consideration is that EMA experts assess evidence in a dynamic manner, with the opportunity to seek further data from the applicant at any stage. For example, during the assessment of post-translational modification for CT-P3 [the biosimilar infliximab CT-P13 approved and marketed as Remsima and Inflectra] it became clear that there were differences in Fc region fucosylation that impacted upon binding to the Fc receptor Fc $\gamma$ RIII. A series of further *in vitro* assays were performed to assess the functional significance of this, demonstrating differences in binding affinities to natural killer [NK] cells but not neutrophils. The applicant was able to demonstrate that these differences in NK cell binding were not observed in the presence of diluted serum from a Crohn's disease patient, and in dialogue with the EMA was successful in arguing that any Fc $\gamma$ RIII binding differences were not of clinical significance.<sup>1,2</sup>

### 3. Extrapolation

The concept of 'extrapolation of indications' [or, to use the official terminology as adopted in EMA guidelines, 'extrapolation of

**Table 2.** Summary of pivotal clinical data required for EMA application for biosimilarity and examples for biosimilar infliximab.

| Characteristic      | Requirements                                                                                                                                                                    | CT-P13 <sup>25,26</sup> [Inflectra, Remsima]                                                                                                                                                                          | SB2 <sup>29</sup> [Flixabi]                                                                                                                                                                                                   |
|---------------------|---------------------------------------------------------------------------------------------------------------------------------------------------------------------------------|-----------------------------------------------------------------------------------------------------------------------------------------------------------------------------------------------------------------------|-------------------------------------------------------------------------------------------------------------------------------------------------------------------------------------------------------------------------------|
| PK assessment       | Multiple parameters tested in rodent and human studies. eg: 90% CI for AUC and C <sub>max</sub> must be within 90–125% of originator                                            | Phase I PK study versus Remicade in ankylosing spondylitis patients [ <i>n</i> = 250]: AUC: 104% [94–115%], C <sub>max</sub> : 101% [95–109%]                                                                         | Phase I PK study versus Remicade in healthy subjects [ <i>n</i> = 106]: AUC: 99% [90–108%], C <sub>max</sub> : 101% [96–105%]                                                                                                 |
| Efficacy assessment | Evidence of efficacy equivalent to that of originator compound in phase III study for one of licensed indications, eg 95% CI for primary endpoint must be < ± 15% of originator | 54-week phase III study in rheumatoid arthritis patients on methotrexate [ <i>n</i> = 606]. Primary endpoint [% ACR20 responders at Week 30] 60.9% [CT-P13] vs 58.6% [Remicade]. [95% CI for difference: -6% to +10%] | 54-week phase III study in rheumatoid arthritis patients on methotrexate [ <i>n</i> = 584]. Primary endpoint [% of ACR20 responders at Week 30] 64.1% [SB2] versus 66.0% [Remicade]. [95% CI for difference: -10.3% to +6.5%] |

EMA, European Medicines Agency; AUC: area under concentration/time curve after administration of test dose; C<sub>max</sub>: peak concentration; CI: confidence interval; PK: pharmacokinetic; ACR20: American College of Rheumatology scoring system 20% response.

evidence’] has been much discussed since the first general guidelines were developed by the Committee for Human Medicinal Products [CHMP] in 2005.<sup>25,26</sup> The aim was to cover cases where the originally authorised biological medicinal product [the so-called ‘reference medicinal product’] had been authorised for several indications and to determine whether or not the medicinal product claiming to be similar could also be authorised for the same set of indications. To answer this question, the initial concept was that the efficacy and safety profile ‘has to be justified or, if necessary, demonstrated separately for each of the claimed indications. In certain cases, it may be possible to extrapolate therapeutic similarity shown in one indication to other indications of the reference medicinal product...’ This notion of extrapolation was essentially based on ‘appropriate justifications’,<sup>29</sup> including consideration of the clinical experience and the mechanism of action and whether the ‘same receptor’ is involved.<sup>26</sup>

Later updates of the EMA guidelines have used more specific wording, and the notion has evolved gradually, depending on the product concerned. The first evolution was that if the indication used to demonstrate clinical comparability was the ‘most sensitive and relevant’, the extrapolation of the results to the other indications would be possible, providing the mechanism of action is the same.<sup>26,29–31</sup> However, unlike biosimilars of simple molecules, marketing authorisation for complex molecules, such as monoclonal antibodies [mAb] is very complex. Thus, for biosimilars of mAb, we have witnessed a progressive evolution in reasoning and approach, first announced by Schneider *et al.*<sup>31</sup> and further confirmed in the most recent published EMA guideline,<sup>32</sup> which states that ‘Extrapolation of clinical efficacy and safety data to other indications of the reference mAb, not specifically studied during the clinical development of the biosimilar mAb, is possible based on the overall evidence of comparability provided from the comparability exercise and with adequate justification’ but not as an ‘automatic or systemic conclusion’.<sup>27,33–35</sup> In this regard, the EMA has incorporated the mode of action of monoclonal antibody biosimilars in the ‘totality of evidence with adequate and relevant justification’.<sup>35</sup>

Despite a stringent approval process, acceptance of biosimilars in the medical community encountered some resistance. This appears to be especially true for therapeutic indications for which no specific clinical trials with the biosimilar have been performed and that have been approved based on extrapolation. Reasons for this distrust may be several, including the cited paradigm that biosimilars are ‘similar but not identical’, and the fact that clinicians tend to mainly look at clinical trial data for their own disease area to judge the efficacy and safety of a medicinal product. However, biosimilar development programmes are not aimed at demonstrating clinical efficacy

of biosimilars in a particular clinical condition, since this has already been established for the reference product, but to demonstrate similarity with the reference product in highly sensitive experimental conditions using state-of-the-art analytical tools.<sup>28</sup> Thus, regulatory requirements for the development of a biosimilar demand a comprehensive comparability exercise, as detailed above.<sup>25,26,36</sup> The rigour of this exercise is such that biosimilarity can usually be characterised much more sensitively by performing appropriate assays than clinical studies.<sup>35</sup> Demonstration of clinical equivalence must then be achieved in a study population where the sensitivity to the treatment effect is maximised, that is a clinical indication where original trial data suggested the smallest difference from placebo, even at the cost of not representing the real target population. However, the resulting data should be relevant to the target indication.<sup>26,33,36</sup> This paradigm may seem counterintuitive to practitioners, and some of them may be reluctant to use a biosimilar in an indication for which therapeutic equivalence has not been specifically tested. In that regard it is important to consider that two biological products showing similarity across a comprehensive non-clinical and clinical data package will behave similarly in an insensitive therapeutic clinical study aiming to show therapeutic equivalence. This line of thinking is the cornerstone behind the revision of the biosimilar regulatory approach.<sup>37</sup>

The EMA granted a positive opinion for the first biosimilar monoclonal antibody CT-P13, a biosimilar of Remicade, in 2013.<sup>1</sup> This was based on the notion of ‘totality of evidence’, meaning the inclusion of robust comparisons of the physicochemical and *in vitro* and *ex vivo* biological analyses, dose-dependent suppression of pro-inflammatory cytokines, and inhibition of apoptosis demonstrated in a model of inflammation, among other extensive tests. It is clearly indicated in the public assessment report that the applicant has covered the two recommended doses of infliximab [3 and 5 mg/kg; Remicade] and that additional pharmacokinetics, pharmacodynamics, and potency test results have been considered in the ‘totality of evidence’ approach. The same principles guided the approval of the second Remicade biosimilar, Flixabi, in 2016.<sup>38</sup>

The principle of extrapolation should consider both the patient perspective and the cost of development. From the patient perspective, it is the duty of the competent authorities to authorise a copy version of a reference medicinal product with the guarantee that it will exhibit the same efficacy and safety, whatever the development plan adopted. From the economic perspective, it is also a duty not to impose unnecessary repetition of tests and waste resources to confirm what can be established by appropriate analytical and functional tests and justifications. The ‘totality of evidence’ is certainly a

scientific and pragmatic approach; 'extrapolation of indication' cannot be an automatic or systematic conclusion.

When a biosimilar product is registered in the EU, it is considered to be as safe and efficacious as the reference product when used in accordance with the information provided in the summary of product characteristics. However, the two trials required by the EMA to approve a biosimilar mAb may not be sufficient to detect differences in the safety profile related to very infrequent events. In contrast to post-marketing monitoring of the safety for generic medicines, post-marketing safety monitoring of biosimilars is a formal regulatory requirement in the EU. This requirement is as stringent as for any other biological product, and requires the provision and evaluation of a risk management plan and for there to be an adequate pharmacovigilance system in place. This is aimed not only to track and monitor potential differences in the immunogenicity profile, but also to be a proactive system to minimise and detect identified and potential risks associated with the product, even if they are rare.

The initial observational data published on efficacy and safety of CT-P13 in IBD,<sup>19</sup> including immunogenicity data<sup>20,39</sup> show a profile that completely overlaps with the originator.

#### 4. Interchangeability and Switching

To further assess data relating to the efficacy of biosimilars drugs in IBD, we performed an update of a recent systematic review.<sup>40</sup> A total of 15 studies met the inclusion criteria for reporting efficacy, safety, and immunogenicity [Tables 3–5].

The first reports on switching from the originator to biosimilar infliximab in IBD demonstrated similar clinical efficacy of the biosimilar infliximab compared with the originator compound.<sup>40–43</sup> Several cohort studies across Europe have evaluated clinical efficacy, safety, and immunogenicity in patients who were switched from the originator to CT-P13.<sup>14–18,44–48</sup> Over a total of 497 patients switched from originator to CT-P13 in different countries [Spain, the UK,

**Table 3.** Characteristics of the studies evaluating the efficacy of CT-P13 in IBD patients.<sup>40</sup>

| Study                                                     | Study population                                                                                                  | Clinical response rates                                                                                                                                                                                               | Clinical remission rates                                                                                                                                                        |
|-----------------------------------------------------------|-------------------------------------------------------------------------------------------------------------------|-----------------------------------------------------------------------------------------------------------------------------------------------------------------------------------------------------------------------|---------------------------------------------------------------------------------------------------------------------------------------------------------------------------------|
| Jung YS <i>et al.</i> ,<br>South Korea <sup>42</sup>      | 74 patients<br>[32 anti-TNF naïve CD, 42 anti-TNF naïve UC]                                                       | CD: 90.6% at Week 8, 95.5% at Week 30,<br>87.5% at Week 54<br>UC: 81% at Week 8, 91.3% at Week 30,<br>100% at Week 54                                                                                                 | CD: 84.4% at Week 8, 77.3% at Week 30,<br>75% at Week 54<br>UC: 38.1% at Week 8, 47.8% at Week 30,<br>50% at Week 54                                                            |
| Park SH <i>et al.</i> ,<br>South Korea <sup>43</sup>      | 173 patients<br>[83 moderate-to-severe CD, 12 fistulizing CD or 78 moderate-to-severe UC]                         | Moderate-to-severe CD: 87.2% at Week 14,<br>79.5% at Week 30<br>Fistulising CD: 66.7% at Week 14, 66.7%<br>at Week 30<br>Moderate-to-severe UC: 75.5% at Week 14,<br>- 72.2% at Week 30                               | Moderate-to-severe CD: 69.2% at<br>Week 14, 59% at Week 30<br>Fistulising CD:<br>33.3% at Week 14, 50% at Week 30<br>Moderate-to-severe UC: 49.1% at<br>Week 14, 37% at Week 30 |
| Kang YS <i>et al.</i> ,<br>South Korea <sup>41</sup>      | 17 patients enrolled [8 CD, 9 UC].<br>Induction treatments were done in 5 UC<br>and 3 CD patients                 | Clinical response and remission at Week 8 were<br>achieved in 7 patients [5 UC and<br>2 CD]                                                                                                                           |                                                                                                                                                                                 |
| Farkas <i>et al.</i> ,<br>Hungary <sup>14</sup>           | 39 patients enrolled [18 CD, 21 UC].<br>Induction treatment was completed in<br>16 CD patients and 15 UC patients | CD: 37.5% at Week 8<br>UC: 20% at Week 8                                                                                                                                                                              | CD: 50% at Week 8<br>UC: 66.7% at Week 8                                                                                                                                        |
| Farkas <i>et al.</i> ,<br>Hungary <sup>45</sup>           | 63 UC patients [24 in acute severe flare-up,<br>39 in chronic, refractory activity]                               | UC: 82.5% at Week 14                                                                                                                                                                                                  | UC: 47.6% steroid-free remission at<br>Week 14                                                                                                                                  |
| Gecse KB <i>et al.</i> ,<br>Hungary <sup>16</sup>         | 210 patients [126 CD, 84 UC]                                                                                      | CD: 81.4% at Week 14<br>UC: 77.6% at Week 14                                                                                                                                                                          | CD: 53.6% at Week 14<br>UC: 58.6% at Week 14                                                                                                                                    |
| Gecse K <i>et al.</i> ,<br>Hungary <sup>68</sup>          | 291 patients [184 CD, 107 UC]                                                                                     | CD: 83% at Week 14, 77% at Week 30,<br>58% at Week 54<br>UC: 78% at Week 14, 69% at Week 30,<br>64% at Week 54                                                                                                        | CD: 55% at Week 14, 57% at Week 30,<br>47% at Week 54<br>UC: 59% at Week 14, 46% at Week 30,<br>53% at Week 54                                                                  |
| Keil R <i>et al.</i> ,<br>Czech Republic <sup>69</sup>    | 52 patients [30 CD, 22 UC]                                                                                        | Partial response in CD [ $\geq$ 70-point decrease<br>in CDAI score from baseline] at Week 14:<br>50%<br>Partial response in UC [ $\geq$ 2-point decrease in<br>partial Mayo score from baseline] at Week<br>14: 54.5% | Remission in CD [CDAI < 150] at Week<br>14: 50% remission in UC [total score on<br>partial Mayo index $\leq$ 2 points] at Week<br>14: 40.9%                                     |
| Jahnsen J <i>et al.</i> ,<br>Norway <sup>46</sup>         | 78 patients [46 CD, 32 UC]                                                                                        | N.A.                                                                                                                                                                                                                  | CD: 79% at Week 14<br>UC: 56% at Week 14                                                                                                                                        |
| Smits LJ <i>et al.</i> ,<br>The Netherlands <sup>70</sup> | 83 patients [57 CD, 24 UC,<br>2 IBD-unclassified]                                                                 | N.A.                                                                                                                                                                                                                  | N.A.                                                                                                                                                                            |
| Bortlik M <i>et al.</i> ,<br>Czech Republic <sup>71</sup> | 104 patients [79 CD, 25 UC]                                                                                       | CD: 89.6% at Week 22<br>UC: 78.3% at Week 22                                                                                                                                                                          | UC: 50% of mucosal healing [Mayo<br>endoscopic sub-score 0 or 1] at Week 22                                                                                                     |
| Kolar M <i>et al.</i> ,<br>Czech Republic <sup>47</sup>   | 74 patients [56 CD, 18 UC]                                                                                        | After switching from original to biosimilar IFX:<br>disease activity was stable until the<br>end of follow-up [remission at Week 0<br>versus Week 24: 72% versus 78%]. One<br>patient presented loss of response      |                                                                                                                                                                                 |
| Fiorino G <i>et al.</i> ,<br>Italy <sup>15</sup>          | 397 patients [223 CD, 174 UC]                                                                                     | Were considered responders: 144/156 naïve<br>patients [69 CD]. 49/58 previously exposed<br>to anti-TNF [42 CD] and 77/82 [43 CD]<br>switched                                                                          | N.A.                                                                                                                                                                            |

CD, Crohn's disease; UC, ulcerative colitis; IBD, inflammatory bowel disease; TNF, tumour necrosis factor; IFX, infliximab; CRP, C-reactive protein; N.A., not available; CDAI, Crohn's Disease Activity Index.

**Table 4.** Characteristics of the studies evaluating the safety of CT-P13 in IBD patients.<sup>40</sup>

| Study                                                  | Study population                                                                     | Adverse events                                                        | Infusion-related reaction | Death |
|--------------------------------------------------------|--------------------------------------------------------------------------------------|-----------------------------------------------------------------------|---------------------------|-------|
| Jung YS <i>et al.</i> , South Korea <sup>42</sup>      | 74 patients [32 anti-TNF naïve CD, 42 anti-TNF naïve UC]                             | N.A.                                                                  | 0                         | 0     |
| Park SH <i>et al.</i> , South Korea <sup>43</sup>      | 173 patients [83 moderate-to-severe CD, 12 fistulising CD, 78 moderate-to-severe UC] | Mild-moderate in severity: 10%. Infections: 2, abdominal pain: 1      | 2                         | 0     |
| Keil R <i>et al.</i> , Czech Republic <sup>69</sup>    | 52 patients [30 CD, 22 UC]                                                           | Lower-extremity phlebothrombosis: 1, herpes labialis: 1, pneumonia: 1 | 1                         | 0     |
| Gecse KB <i>et al.</i> , Hungary <sup>16</sup>         | 210 patients [126 CD, 84 UC]                                                         | 17.1% of all patients, infections: 5.7%                               | 6.6%                      | 0     |
| Gecse KB <i>et al.</i> , Hungary <sup>68</sup>         | 291 patients [184 CD, 107 UC]                                                        | Infections: 23 [7.9%]                                                 | 21 [6.6%]                 | 1     |
| Smits LJ <i>et al.</i> , The Netherlands <sup>70</sup> | 83 patients [57 CD, 24 UC, 2 IBD-unclassified]                                       | N.A.                                                                  | N.A.                      | 0     |
| Bortlik M <i>et al.</i> , Czech Republic <sup>71</sup> | 104 patients [79 anti-TNF naïve CD, 25 anti-TNF naïve UC]                            | Infections: 10, skin lesions: 10                                      | 0                         | 0     |
| Kolar M <i>et al.</i> , Czech Republic <sup>47</sup>   | 74 patients [56 CD, 18 UC]                                                           | 1                                                                     | 0                         | 0     |
| Fiorino G <i>et al.</i> , Italy <sup>15</sup>          | 397 patients [223 CD, 174 UC]                                                        | 33 [8.3%]                                                             | 21 [5.3%]                 | 0     |

CD, Crohn's disease; UC, ulcerative colitis; IBD, inflammatory bowel disease; AEs, adverse events; N.A., not available, TNF, tumour necrosis factor.

**Table 5.** Characteristics of the studies evaluating the immunogenicity of CT-P13 in IBD patients.<sup>40</sup>

| Study                                                    | Study population                                                                                                                | Antidrug antibodies [ADA]                                                                                                                                                                                                                                                                                    |
|----------------------------------------------------------|---------------------------------------------------------------------------------------------------------------------------------|--------------------------------------------------------------------------------------------------------------------------------------------------------------------------------------------------------------------------------------------------------------------------------------------------------------|
| Gecse KB <i>et al.</i> , Hungary <sup>16</sup>           | 210 patients [126 CD, 84 UC]                                                                                                    | Baseline ADA positivity was detected in a significantly higher number of patients who had received previously IFX treatment as compared with IFX-naïve patients                                                                                                                                              |
| Kolar M <i>et al.</i> , Czech Republic <sup>47</sup>     | 74 patients [56 CD, 18 UC]                                                                                                      | No increase in immunogenicity was found after switching from originator to biosimilar IFX                                                                                                                                                                                                                    |
| Ben-Horin S <i>et al.</i> <sup>20</sup>                  | Sera from 125 IBD patients and controls                                                                                         | All 56 anti-Remicade® ADA-negative control sera were also negative for anti-Remsima® ADA. All 69 positive anti-Remicade® IBD sera were cross-reactive with Remsima®                                                                                                                                          |
| Malickova K <i>et al.</i> , Czech Republic <sup>72</sup> | 60 IFX-naïve IBD patients treated by the biosimilar IFX [Remsima®] and 71 IBD patients treated by the innovator IFX [Remicade®] | At Week 2: no significant difference in proportion of patients with positive ADA was observed between original and biosimilar IFX. At Week 14: the proportion of patients with positive antibodies [ADA, ANA, anti-dsDNA, and anti-ENA] was not different comparing therapy with original and biosimilar IFX |

CD, Crohn's disease; UC, ulcerative colitis; IBD, inflammatory bowel disease; IFX, infliximab; ADA, antidrug antibodies; ANA, antinuclear antibodies; anti-dsDNA, anti-double-stranded DNA; anti-ENA: anti-extractable nuclear antigens.

The Netherlands, and the Czech Republic], treatment persistency ranged from 57% to 88% at the end of the follow-up. No significant increase in terms of adverse events was found in any of those studies. Positivity to anti-drug antibodies [ADA] was similar between the baseline and the end of the follow-up.

Preliminary data from a prospective, nationwide, observational cohort by Fiorino *et al.*, including the largest population of IBD patients [ $n = 547$ , CD/UC: 312/235], showed that the response rates in patients following the induction regimen or at least two infusions with CT-P13 was 90% in anti-TNF naïve patients, 89% in patients receiving re-induction after previous treatment with anti-TNF, and 100% for those stable patients switched to biosimilars from originator. After a median follow-up of 4 months, the rate of loss of response in switched patients was 7.9% compared with 17.8% and 29.1% in naïve patients and in patients previously treated with anti-TNF [ $p = 0.08$ ], respectively; 66 [12%] adverse events occurred, mainly infusion reactions [58%], leading to discontinuation of biosimilar infliximab therapy in 45 patients [8%]. Infusion reactions occurred in a significantly higher proportion of patients [incidence rate ratio:

2.82; 1.05–7.29] previously exposed to infliximab in whom treatment had been stopped for a drug holiday > 4 months.<sup>15</sup>

Further data on switching from the originator to biosimilar infliximab therapy from ongoing trials are about to be published. The randomised, phase-IV, double-blind, parallel-group NOR-SWITCH study<sup>49</sup> [NCT02148640] was initiated to test interchangeability from originator to biosimilar infliximab in patients with rheumatoid arthritis, spondyloarthritis, psoriatic arthritis, ulcerative colitis [UC], Crohn's disease [CD], and chronic plaque psoriasis.<sup>21</sup> It was designed as a non-inferiority trial with a non-inferiority margin set to 15%. Power calculations indicated that 394 patients were required in the primary per protocol set [PPS]. All adult patients on stable treatment with the originator infliximab for at least 6 months for any indication were eligible. Patients with informed consent were randomised 1:1 to either continue originator infliximab or switch to CT-P13 treatment using an unchanged dosing regimen. The primary endpoint was disease worsening during follow-up according to a worsening in disease-specific composite measures and/or a consensus between investigator and patient

leading to major change in treatment. This study enrolled 481 patients, from 40 Norwegian study centres. They were randomised to receive treatment and were followed for 52 weeks. Disease worsening occurred in 26.2% and 29.6% of patients in the originator and CTP13 arms, respectively (difference -4.4%, 95% confidence interval [CI] -12.7–3.9). The frequency of disease worsening in each specific diagnosis, and changes in the generic disease variables and disease-specific composite measures, were not different in either of the arms. The incidence of anti-drug antibodies detected during the study was 17 [7.1%] and 19 [7.9%] in the originator and CT-P13 patients, respectively. Trough drug levels and the frequencies of reported adverse events, including infusion reactions, were also not different.<sup>21</sup>

Furthermore, a randomised, double-blind, parallel-group, phase 3 study [NCT02096861] is ongoing to demonstrate non-inferiority in efficacy and to assess overall safety of CT P13 compared with Remicade in patients with active Crohn's disease.<sup>50</sup> The aim of the phase 4 SIMILAR trial [NCT02452151] is to assess efficacy of biosimilar infliximab compared with the originator compound in CD and UC patients in remission under treatment with infliximab for up to 3 months.<sup>50</sup>

Limited data are available on paediatric IBD patients. In a multi-centre observational cohort enrolling 32 paediatric patients, studied by Siczowska *et al.*, 88% of CD and 57% of patients who were switched still maintained clinical remission in the follow-up time [median time for CD 8 ± 2.6 months; UC: 5 ± 3.6 months]. Only one CD patient had an allergic reaction after switching. ADA and trough levels were not different from the baseline.

In conclusion, there have been no reports so far that switching from the reference to the biosimilar infliximab CT-P13 has caused problems, in either adult or paediatric IBD patients. On the contrary, an increasing number of publications have shown that there are no safety or efficacy concerns about switching. No studies have addressed so far efficacy, safety, and immunogenicity of cross-switching [switching between two biosimilars], reverse-switching [switching from a biosimilar to its originator], or multiples or repeated switches. However, from an immunological point of view it should be noted that antibodies can develop usually within 2–3 treatments; therefore to support a high level of pharmacovigilance, a switch within 6 months due to non-medical reasons should not be advised.

## 5. Immunogenicity

Immunogenicity is a well-known complication during treatment with biologic agents and involves the formation of anti-drug antibodies [ADAs] affecting treatment. For anti-TNF drugs, ADAs are associated with alterations in anti-TNF levels, reduced efficacy, and side-effects including allergic reactions. A systematic review<sup>51</sup> reported on ADA formation in a total of 68 studies of anti-TNF treated patients, with a cumulative incidence of ADAs of 12.7%, which was highest in patients using infliximab [25.3%].

The best level of evidence outside IBD came from two randomised controlled trials [RCTs] [PLANET-RA and PLANET-AS], showing no difference in terms of ADA formation between the study populations treated with either infliximab originator and or CT-P13, at Weeks 52<sup>3,4</sup> and 104.<sup>52,53</sup> A recent systematic review<sup>54</sup> reported no increased ADAs formation in RA patients treated with biosimilars and concluded that immunogenicity seemed comparable across treatment groups in all studies.

In IBD, following the publication of cohort studies [Table 5] an interesting study showed high similarity in binding, illustrating

similar immunogenicity and the presence of shared immune-dominant epitopes in CT-P13 and infliximab originator sequences. In addition, anti-adalimumab antibodies did not cross-react with CT-P13 or infliximab originator.<sup>20</sup> More recently, the NORSWITCH study<sup>21</sup> clearly established that no differences in terms of ADA formation were found between patients switched to CT-P13 and all the study patients or the subgroups of patients stratified for disease.

Data from the clinical development programme that led to the very recent approval of SB2 biosimilar of infliximab [Flixabi] has shown a slight excess of ADA positivity which was higher in the RA trial.<sup>38</sup> ADA rates were higher in the Flixabi cohort by 5–12% at the individual time points of determination [with about 50% of patients in the Flixabi cohort determined ADA-positive]. Despite these numerical differences observed, there was no meaningful effect on any of the efficacy parameters analysed. Sub-group analyses did not reveal differences of clinical relevance in either ADA-positive or ADA-negative subjects when comparing Flixabi and originator cohorts. Limitations in the immunogenicity assays that were used to test ADA may explain the higher incidence of ADA in the Flixabi cohort.<sup>38</sup>

## 6. ECCO Statements

A consensus meeting was held on October 15, 2016 in Vienna. Based on the current regulatory guidance from the European Medicines Agency and the evidence about efficacy and safety of biosimilars in IBD patients, the attendees agreed on the following statements:

1. Biosimilarity is more sensitively characterised by performing suitable *in vitro* assays than clinical studies.
2. Clinical studies of equivalence in the most sensitive indication can provide the basis for extrapolation. Therefore data for the usage of biosimilars in IBD can be extrapolated from another sensitive indication.
3. When a biosimilar product is registered in the EU, it is considered to be as efficacious as the reference product when used in accordance with the information provided in the Summary of Product Characteristics.
4. Demonstration of safety of biosimilars requires large observational studies with long-term follow-up in IBD patients. This should be supplemented by registries supported by all involved stakeholders [manufacturer, healthcare professionals and patients' associations].
5. Adverse events and loss of response due to immunogenicity to a biologic drug cannot be expected to be overcome with a biosimilar of the same molecule.
6. As for all biologics, traceability should be based on a robust pharmacovigilance system and the manufacturing risk management plan.
7. Switching from the originator to a biosimilar in patients with IBD is acceptable. Studies of switching can provide valuable evidence for safety and efficacy. Scientific and clinical evidence is lacking regarding reverse switching, multiple switching, and cross-switching among biosimilars in IBD patients
8. Switching from originator to a biosimilar should be performed following appropriate discussion between physicians, nurses, pharmacists, and patients, and according to national recommendation. The IBD nurse can play a key role in communicating the importance and equivalence of biosimilar therapy.

## 7. Practical Aspects: Communication with the Patient

Making treatment decisions in IBD is becoming more complex due to the advent of biologic and now biosimilar therapies and shifts in the paradigm of care.<sup>55</sup> Communicating the need for and risk of therapies to patients has always been challenging, and now healthcare professionals need to provide balanced information to assist patients to make preference-sensitive decisions.<sup>56</sup> Healthcare professionals have the responsibility to ensure that all information is given to the patient to promote shared decision making, confirming informed consent to treatment and evidence-based patient choice.<sup>57,58</sup> The patient's health literacy must be considered to ensure that the information communicated is at the correct level of understanding<sup>59</sup> and the benefits and risk outlined.<sup>60,61</sup> Patients will require the same level of information whether starting on a biologic or a biosimilar.

The decision to initiate a biologic, biosimilar, or non-medical biosimilar switch, should always take into account patient preference. The information offered must be transparent and the requirement of a non-medical switch must be made clear to the patient e.g. financial savings or additional services attached to the switch, i.e. the 'biologics experience'.<sup>62</sup> Based on the recent web survey by the European Federation of Crohn's and Ulcerative Colitis Associations [EFCCA],<sup>63</sup> out of 1181 patients who responded, only 38% had ever heard of biosimilars. The respondents worried about biosimilars' safety profile [47.0%], efficacy [40.3%], and molecular basis [35.0%]. Only 25.2% of the respondents had no concerns about biosimilars. Just over half [55.9%] of respondents thought that the lower cost of the biosimilars should not come before their safety and efficacy. Only 12.5% of respondents felt that extrapolation made sense. The survey showed that 39.9% felt that patients should be systematically informed, and 26.7% felt that patient associations should be informed and able to give their opinions. It also revealed that 20.9% of the respondents would be against the idea of interchangeability, unless the patient was well informed and shared the decision. Only 31.0% of the respondents would be fully confident about biosimilars, even if they were prescribed and explained by the treating physician.<sup>63</sup> In order to inform patients on the safety and efficacy of biosimilars exhaustively, the communication style must be tailored to meet the patients' needs. In many countries, the IBD nurse may be in a central position to support the patient during the initiation of a biosimilar or a switch. The patient's willingness to commence a medication is influenced by how they judge the need for the treatment relative to their concerns about taking it,<sup>64</sup> and the relationship between the patient and IBD nurse is built to develop and support these judgements.<sup>65</sup> The challenge for the IBD nurse or any healthcare professional in this position is to communicate the tangible benefits of the biosimilar product, and in the case of a switch, over and above the originator, and this is achieved by the education of all concerned in the evidence base for biosimilars. The consultation must be patient-centred, balanced, and must include the impact that the medication will have on the patient's quality of life.<sup>66,67</sup>

## Conflict of Interest

SD has served as a speaker, consultant, and advisory board member for Schering-Plough, Abbott Laboratories, Merck, UCB-pharma, Ferring, Cellerix, Millenium Takeda, Nycomed, Pharmacosmos, Actelion, Danone, Alpha Wasserman, Genentech, Grunenthal, Pfizer, Astra Zeneca, Novo Nordisk, Cosmo Pharmaceuticals, Vifor, and Johnson & Johnson. GF served as a consultant and advisory board member for MSD, AbbVie, Takeda, Janssen, Mundipharma, Sandoz, Pfizer, Samsung Bioepis, Celltrion. TR has served as a speaker/or advisory board member for Abbvie, Astellas, Dr Falk, GSK, Janssen, MSD, Takeda.

JK has served as a speaker and/or advisory board member for AbbVie, Celltrion, EGIS, Kyowa Hako Kirin Pharma, MSD, Takeda. LPL has served as a speaker and/or advisory board member for AbbVie, Celltrion, EGIS, Falk Pharma GmbH, Ferring, Genentech, Hospira, Kyowa Hako Kirin Pharma, Mitsubishi Tanabe Pharma Corporation, MSD, Otsuka, Pharmacosmos, Pfizer, Roche and Takeda, and received unrestricted research grants from AbbVie, MSD, Pfizer/Hospira. GJM has received honoraria for lectures, consultations, advisory boards and clinical trials from AbbVie, Amgen, Angelini, Astellas, Astra-Zeneca, Danone, Falk Pharma, Ferring, GSK, Hoffmann-La Roche, Hospira, Janssen, Menarini, Millenium, MSD, OMEGA Pharma, Otsuka, Pharmacosmos, Pfizer, Sandoz, Takeda. LPB has received honoraria from Merck, Abbvie, Janssen, Genentech, Mitsubishi, Ferring, Norgine, Tillots, Vifor, Hospira/Pfizer, Celltrion, Takeda, Biogaran, Boehringer-Ingelheim, Lilly, HAC-Pharma, Index Pharmaceuticals, Amgen, Sandoz, Forward Pharma GmbH, Celgene, Biogen, Lycera, Samsung Bioepis. MF has received a research grant from Takeda; Speakers fees from Abbvie, Boehringer-Ingelheim, Chiesi, Falk, Ferring, Janssen, Mitsubishi Tanabe, MSD, Takeda, Tillotts, Zeria; Consultancy fees from: Abbvie, Boehringer-Ingelheim, Ferring, Janssen, MSD.

## References

1. European Medicines Agency. CHMP assessment report Remsima [EMA/CHMP/589317/2013]. London: EMA, 2013.
2. European Medicine Agency. [EMA/CHMP/589422/2013]. 2013. [http://www.ema.europa.eu/docs/en\\_GB/document\\_library/EPAR\\_-\\_Public\\_assessment\\_report/human/002778/WC500151490.pdf](http://www.ema.europa.eu/docs/en_GB/document_library/EPAR_-_Public_assessment_report/human/002778/WC500151490.pdf). Accessed October 26, 2016.
3. Park W, Hrycaj P, Jeka S, et al. A randomised, double-blind, multicentre, parallel-group, prospective study comparing the pharmacokinetics, safety, and efficacy of CT-P13 and innovator infliximab in patients with ankylosing spondylitis: the PLANETAS study. *Ann Rheum Dis* 2013;72:1605–12.
4. Yoo DH, Hrycaj P, Miranda P, et al. A randomised, double-blind, parallel-group study to demonstrate equivalence in efficacy and safety of CT-P13 compared with innovator infliximab when coadministered with methotrexate in patients with active rheumatoid arthritis: the PLANETRA study. *Ann Rheum Dis* 2013;72:1613–20.
5. Danese S, Gomollon F; Governing Board and Operational Board of ECCO. ECCO position statement: the use of biosimilar medicines in the treatment of inflammatory bowel disease [IBD]. *J Crohns Colitis* 2013;7:586–9.
6. Annese V, Vecchi M; Italian Group for the Study of IBD [IG-IBD]. Use of biosimilars in inflammatory bowel disease: statements of the Italian group for inflammatory bowel disease. *Dig Liver Dis* 2014;46:963–8.
7. Argüelles-Arias F, Barreiro-de-Acosta M, Carballo F, Hinojosa J, Tejerina T. Joint position statement by 'Sociedad Española de Patología Digestiva' [Spanish Society of Gastroenterology] and 'Sociedad Española de Farmacología' [Spanish Society of Pharmacology] on biosimilar therapy for inflammatory bowel disease. *Rev Esp Enferm Dig* 2013;105:37–43.
8. British Society of Gastroenterology. <http://www.bsg.org.uk/clinical/news/bsg-guidance-on-the-use-of-biosimilar-infliximab-ct-p13-in-ibd.html>.
9. Vermeire S, Louis E, Dewit O, et al.; Belgian IBD Research & Development [BIRD]. Clinical and scientific aspects related to biosimilars in inflammatory bowel diseases [IBD]: position document of the Belgian IBD Research & Development Group [BIRD]. *Acta Gastroenterol Belg* 2015;78:26–9.
10. Mularczyk A, Gonciarz M, Bartnik W, et al. Biosimilar medicines - their use in the treatment of inflammatory bowel diseases. Position statement of the Working Group of the Polish National Consultant in Gastroenterology. *Prz Gastroenterol* 2014;9:1–3.
11. de Ridder L, Waterman M, Turner D, et al.; ESPGHAN Paediatric IBD Porto Group. Use of biosimilars in paediatric inflammatory bowel disease: a position statement of the ESPGHAN paediatric IBD Porto Group. *J Pediatr Gastroenterol Nutr* 2015;61:503–8.
12. Devlin SM, Bressler B, Bernstein CN, et al. Overview of subsequent entry biologics for the management of inflammatory bowel disease and Canadian Association of Gastroenterology position statement on subsequent entry biologics. *Can J Gastroenterol* 2013;27:567–71.
13. Danese S, Fiorino G, Michetti P. Viewpoint: knowledge and viewpoints on biosimilar monoclonal antibodies among members of the European Crohn's and Colitis Organisation. *J Crohns Colitis* 2014;8:1548–50.

14. Farkas K, Rutka M, Bálint A, *et al.* Efficacy of the new infliximab biosimilar CT-P13 induction therapy in Crohn's disease and ulcerative colitis - experiences from a single center. *Expert Opin Biol Ther* 2015;15: 1257-62.
15. Fiorino G, Manetti N, Variola A, *et al.* Prospective observational study on inflammatory bowel disease patients treated with infliximab biosimilars: preliminary results of the PROSIT-BIO cohort of the IG-IBD. *Inflamm Bowel Dis* 2016; in press [poster presentation].
16. Gece KB, Lovász BD, Farkas K, *et al.* Efficacy and safety of the biosimilar infliximab CT-P13 treatment in inflammatory bowel diseases: a prospective, multicentre, nationwide cohort. *J Crohns Colitis* 2016;10:133-40.
17. Guerra Veloz M, Argüelles Arias F, Perea Amarillo R, *et al.* Safety and efficacy of infliximab biosimilar [Remsima®] in Crohn's disease patients in clinical practice: results after 6 months of treatment. *J Crohns Colitis* 2016;10:S328.
18. Guerra Veloz M, Argüelles Arias F, Perea Amarillo R, *et al.* Safety and efficacy of infliximab biosimilar [Remsima®] in ulcerative colitis disease patients in clinical practice: results after 6-months treatment. *J Crohns Colitis* 2016;10:S405.
19. Jahnsen J, Detlie TE, Vatn S, Ricanek P. Biosimilar infliximab [CT-P13] in the treatment of inflammatory bowel disease: A Norwegian observational study. *Expert Rev Gastroenterol Hepatol* 2015;9[Suppl 1]:45-52.
20. Ben-Horin S, Yavzori M, Benhar I, *et al.* Cross-immunogenicity: antibodies to infliximab in Remicade-treated patients with IBD similarly recognise the biosimilar Remsima. *Gut* 2016;65:1132-8.
21. Jørgensen K, Olsen I, Goll G, *et al.* Biosimilar infliximab [CT-P13] is not inferior to originator infliximab: results from the 52-week randomised NOR-SWITCH trial. 2016. Conference presentation.
22. Danese S, Bonovas S, Peyrin-Biroulet L. Biosimilars in IBD: from theory to practice. *Nat Rev Gastroenterol Hepatol* 2016, 6 Oct 12. doi: 10.1038/ngastro.2016.155. [Epub ahead of print.]
23. Danese S, Fiorino G, Michetti P. Changes in biosimilar knowledge among European Crohn's Colitis Organisation [ECCO] Members: An updated survey. *J Crohns Colitis* 2016;10:1362-5.
24. Weise M, Bielsky MC, De Smet K, *et al.* Biosimilars: what clinicians should know. *Blood* 2012;120:5111-7.
25. European Medicines Agency. Guideline on similar biological medicinal products. [CHMP/437/04], London 2005; Accessed 22 Aug 2016.
26. European Medicines Agency. Guideline on similar biological medicinal products containing biotechnology-derived proteins as active substance: non-clinical and clinical issues [EMA/CHMP/BMWP/42832/2005], London: EMA, 2005.
27. European Medicines Agency. Guideline on similar biological medicinal products. CHMP/437/04 Rev 1 2014. London: EMA, 2014.
28. Weise M, Kurki P, Wolff-Holz E, Bielsky MC, Schneider CK. Biosimilars: the science of extrapolation. *Blood* 2014;124:3191-6.
29. European Medicines Agency. Guidance on similar medicinal products containing somatropin. [EMA/CHMP/BMWP/94528/2005], London: EMA, 2006.
30. European Medicines Agency. Annex to guideline on similar biological medicinal products containing biotechnology-derived proteins as active substance: non-clinical and clinical issues. Guidance on similar medicinal products containing recombinant granulocyte-colony stimulating factor [G-CSF] [EMA/CHMP/BMWP/31329/2005], London: EMA, 2006.
31. Schneider CK, Vlemminckx C, Gravanis I, *et al.* Setting the stage for biosimilar monoclonal antibodies. *Nat Biotechnol* 2012;30:1179-85.
32. European Medicines Agency. Guideline on similar biological medicinal products containing monoclonal antibodies—nonclinical and clinical issues [EMA/CHMP/BMWP/403543/2010] London: EMA, 2012.
33. Schneider CK, Borg JJ, Ehmann F, *et al.*; Working Party on Similar Biological Medicinal P, Biologicals Working Party of the Committee for Medicinal Products for Human Use. In support of the European Union biosimilar framework. *Nat Biotechnol* 2012;30: 745-8; author reply 748-9.
34. European Medicines Agency. Remsima Public Assessment Report [EPAR] [EMA/H/C/002576/0000]. London: EMA, 2013.
35. Tsiftoglou AS, Trouvin JH, Calvo G, Ruiz S. Demonstration of biosimilarity, extrapolation of indications and other challenges related to biosimilars in Europe. *BioDrugs* 2014;28:479-86.
36. European Medicines Agency. Guideline on comparability of biotechnology-derived medicinal products after a change in the manufacturing process. Non-clinical and clinical issues [EMA/CHMP/BMWP/101695/2006]. London: EMA, 2006.
37. Kurki P, Ekman N. Biosimilar regulation in the EU. *Expert Rev Clin Pharmacol* 2015;8:649-59.
38. European Medicines Agency European Medicine Agency. Flixabi. Committee for medicinal products for human use (CHMP). CHMP assessment report [EMA/CHMP/272283/2016]. London: EMA; 2016. [http://www.ema.europa.eu/docs/en\\_GB/document\\_library/EPAR\\_-\\_Public\\_assessment\\_report/human/004020/WC500208358.pdf](http://www.ema.europa.eu/docs/en_GB/document_library/EPAR_-_Public_assessment_report/human/004020/WC500208358.pdf). Accessed October 26 2016.
39. Ben-Horin S, Heap GA, Ahmad T, Kim H, Kwon T, Chowders Y. The immunogenicity of biosimilar infliximab: can we extrapolate the data across indications? *Expert Rev Gastroenterol Hepatol* 2015;9[Suppl 1]:27-34.
40. Martelli L, Peyrin-Biroulet L. Efficacy, safety and immunogenicity of biosimilars in inflammatory bowel diseases: A systematic review. *Curr Med Chem* 2016, Oct 14. [Epub ahead of print.]
41. Kang YS, Moon HH, Lee SE, Lim YJ, Kang HW. Clinical experience of the use of CT-P13, a biosimilar to infliximab in patients with inflammatory bowel disease: a case series. *Dig Dis Sci* 2015;60:951-6.
42. Jung YS, Park DI, Kim YH, *et al.* Efficacy and safety of CT-P13, a biosimilar of infliximab, in patients with inflammatory bowel disease: a retrospective multicenter study. *J Gastroenterol Hepatol* 2015;30:1705-12.
43. Park SH, Kim YH, Lee JH, *et al.* Post-marketing study of biosimilar infliximab [CT-P13] to evaluate its safety and efficacy in Korea. *Expert Rev Gastroenterol Hepatol* 2015;9[Suppl 1]:35-44.
44. Díaz Hernández L, Rodríguez González G, Vela González M, *et al.* Efficacy and safety of switching between originator and biosimilar infliximab in patients with inflammatory bowel disease in practical clinic: results to 6 months. *J Crohns Colitis* 2016;10:S327.
45. Farkas K, Rutka M, Golovics PA, *et al.* Efficacy of infliximab biosimilar CT-p13 induction therapy on mucosal healing in ulcerative colitis. *J Crohns Colitis* 2016;10:1273-8.
46. Jahnsen J. Clinical experience with infliximab biosimilar Remsima [CT-P13] in inflammatory bowel disease patients. *Ther Adv Gastroenterol* 2016;9:322-9.
47. Kolar M, Duricová D, Brotlík M, *et al.* Switching of patients with inflammatory bowel disease from original infliximab [Remicade®] to biosimilar infliximab [Remsima™] is effective and safe. *J Crohns Colitis* 2016;10: S45-6.
48. Sieczkowska J, Jarzębicka D, Banaszkiwicz A, *et al.* Switching between infliximab originator and biosimilar in paediatric patients with inflammatory bowel disease: preliminary observations. *J Crohns Colitis* 2016;10:127-32.
49. A randomised, double-blind, parallel-group study to evaluate the safety and efficacy of switching from innovator infliximab to biosimilar infliximab compared with continued treatment with innovator infliximab in patients with rheumatoid arthritis, spondyloarthritis, psoriatic arthritis, ulcerative colitis, Crohn's disease and chronic plaque psoriasis The NOR-SWITCH Study. Vienna: United European Gastroenterology Week; 2016.
50. [ClinicalTrials.gov](https://clinicaltrials.gov/ct2/show/study/NCT02452151?term=infliximab+and+biosimilar&rank=1). Efficacy and safety of infliximab-biosimilar (Inflextra) compared to infliximab-innovator (Remicade) in patients with inflammatory bowel disease in remission: the SIMILAR trial (SIMILAR). <https://clinicaltrials.gov/ct2/show/study/NCT02452151?term=infliximab+and+biosimilar&rank=1>. Accessed October 26, 2016.
51. Thomas SS, Borazan N, Barroso N, *et al.* Comparative immunogenicity of TNF inhibitors: impact on clinical efficacy and tolerability in the management of autoimmune diseases. a systematic review and meta-analysis. *BioDrugs* 2015;29:241-58.
52. Yoo DH, Prodanovic N, Jaworski J, *et al.* Efficacy and safety of CT-P13 [biosimilar infliximab] in patients with rheumatoid arthritis: comparison between switching from reference infliximab to CT-P13 and continu-



- ing CT-P13 in the PLANETRA extension study. *Ann Rheum Dis* 2016. doi:10.1136/annrheumdis-2015-208786.
53. Park W, Yoo DH, Miranda P, et al. Efficacy and safety of switching from reference infliximab to CT-P13 compared with maintenance of CT-P13 in ankylosing spondylitis: 102-week data from the PLANETAS extension study. *Ann Rheum Dis* 2016. doi:10.1136/annrheumdis-2015-208783.
  54. Chingcuanco F, Segal JB, Kim SC, Alexander GC. Bioequivalence of biosimilar tumor necrosis factor- $\alpha$  inhibitors compared with their reference biologics: a systematic review. *Ann Intern Med* 2016;165:565–74.
  55. Devlin SM, Panaccione R. Evolving inflammatory bowel disease treatment paradigms: top-down versus step-up. *Med Clin North Am* 2010;94:1–18.
  56. Siegel CA. Making therapeutic decisions in inflammatory bowel disease: the role of patients. *Curr Opin Gastroenterol* 2009;25:334–8.
  57. Edwards A, Elwyn G, Thompson R (eds). *Shared Decision-making in Health Care: Achieving Evidence-Based Patient Choice*. 2nd edn. Oxford, UK: Oxford University Press, 2009.
  58. Siegel CA. Shared decision making in inflammatory bowel disease: helping patients understand the tradeoffs between treatment options. *Gut* 2012;61:459–65.
  59. Green JA, Gonzaga AM, Cohen ED, Spagnoletti CL. Addressing health literacy through clear health communication: a training program for internal medicine residents. *Patient Educ Couns* 2014;95:76–82.
  60. European Medicines Agency. Benefit-risk communication to medicines users. London: EMA, 2014.
  61. Siegel CA. Lost in translation: helping patients understand the risks of inflammatory bowel disease therapy. *Inflamm Bowel Dis* 2010;16:2168–72.
  62. Class J, Langis L. A patient centered paradigm for the biosimilars market. *GaBI Journal* 2012;1:17–21.
  63. Peyrin-Biroulet L, Lonnfors S, Roblin X, Danese S, Avedano L. Patient perspectives on biosimilars: a survey by the European Federation of Crohn's and Ulcerative Colitis Associations. *J Crohns Colitis* 2016 [Epub ahead of print].
  64. Clifford S, Barber N, Horne R. Understanding different beliefs held by adherers, unintentional nonadherers, and intentional nonadherers: application of the necessity-concerns framework. *J Psychosom Res* 2008;64:41–6.
  65. O'Connor M, Bager P, Duncan J, et al. N-ECCO consensus statements on the European nursing roles in caring for patients with Crohn's disease or ulcerative colitis. *J Crohns Colitis* 2013;7:744–64.
  66. Fleischer S, Berg A, Zimmermann M, Wüste K, Behrens J. Nurse-patient interaction and communication: a systematic literature review. *J Public Health* 2009;17:339–53.
  67. Nair K, Dolovich L, Cassels A, et al. What patients want to know about their medications. Focus group study of patient and clinician perspectives. *Can Fam Physician* 2002;48:104–10.
  68. Gece K, Vegh Z, Kurti Z, et al. Sa1936 efficacy and safety of biosimilar infliximab after one-year: results from a prospective nationwide cohort. *Gastroenterology* 2016;150:S409.
  69. Keil R, Wasserbauer M, Zádorová Z, et al. Clinical monitoring: infliximab biosimilar CT-P13 in the treatment of Crohn's disease and ulcerative colitis. *Scand J Gastroenterol* 2016;51:1062–8.
  70. Smits LJ, Derikx LA, de Jong DJ, et al. Clinical outcomes following a switch from Remicade® to the biosimilar CT-P13 in inflammatory bowel disease patients: a prospective observational cohort study. *J Crohns Colitis* 2016;10:1287–93.
  71. Bortlik M, Kolar M, Duricova D, et al. Biosimilar infliximab is effective and safe in inflammatory bowel disease patients naive to anti-TNF therapy: a tertiary centre experience. *Gastroenterology* 2016;150:S106.
  72. Malíčková K, Ďuricová D, Bortlík M, et al. Serum trough infliximab levels: A comparison of three different immunoassays for the monitoring of CT-P13 [infliximab] treatment in patients with inflammatory bowel disease. *Biologicals* 2016;44:33–6.
